# Supplementary material
Source: HighWire-hosted journal article supplement (https://cmajopen-stage.highwire.org/highwire/filestream/84445/field_highwire_adjunct_files/2/CMAJOpen-2019-0191-1-at.pdf)
Supplement: CMAJOpen-2019-0191-1-at.pdf [file CMAJOpen-2019-0191-1-at.pdf]

## Appendix 1 (as supplied by the authors)

**Supplementary Table A: Definitions of CDI subtypes**

|                                                     |                                                                                                                                                                        |
|-----------------------------------------------------|------------------------------------------------------------------------------------------------------------------------------------------------------------------------|
| Healthcare facility (HCF) onset, HCF-associated CDI | stool-positive specimen collected >48 hours after admission to a hospital and before discharge                                                                         |
| Community-associated CDI                            | stool-positive specimen while in the community, or within 48 hours of admission to hospital, provided the patient was not in a HCF 12 weeks before CDI onset           |
| Community-onset HCF-associated CDI                  | stool-positive specimen while in the community or within 48-hours after admission to a HCF, provided the patient was discharged from a HCF <4 weeks prior to CDI onset |
| HCF-associated CDI                                  | Healthcare facility (HCF) onset, HCF-associated CDI or Community-onset HCF-associated CDI                                                                              |
| Indeterminate CDI                                   | stool-positive specimen while in the community, discharged from a HCF 4 to 12 weeks prior to CDI onset                                                                 |
| Recurrent CDI                                       | stool-positive specimen collected between 2 and 8 weeks after laboratory-confirmed CDI diagnosis*                                                                      |
| Severe case of CDI                                  | admission to the intensive care unit (ICU), colectomy, and/or death within 30 days of laboratory confirmation of CDI                                                   |
| Incident CDI                                        | An incident case of CDI was defined by a positive stool-specimen result >8 weeks after a previous result, or by the absence of a previous positive result*             |

\*A positive specimen received within 2 weeks of the previous positive result was considered a confirmation of the initial positive result and not included in the definitions

**Supplementary Table B: Proportion of Community Associated CDIs by study year**

| Year | Total number of CDIs | Community Associated CDIs (n) | Community Associated CDIs (%) | Community Associated CDIs (95% Confidence interval) |       |
|------|----------------------|-------------------------------|-------------------------------|-----------------------------------------------------|-------|
| 2005 | 633                  | 171                           | 27.0%                         | 22.9%                                               | 31.1% |
| 2006 | 1066                 | 261                           | 24.5%                         | 21.5%                                               | 27.5% |
| 2007 | 917                  | 238                           | 26.0%                         | 22.6%                                               | 29.3% |
| 2008 | 825                  | 230                           | 27.9%                         | 24.2%                                               | 31.5% |
| 2009 | 787                  | 239                           | 30.4%                         | 26.4%                                               | 34.3% |
| 2010 | 779                  | 200                           | 25.7%                         | 22.1%                                               | 29.3% |
| 2011 | 853                  | 286                           | 33.5%                         | 29.5%                                               | 37.5% |
| 2012 | 765                  | 281                           | 36.7%                         | 32.4%                                               | 41.0% |
| 2013 | 807                  | 302                           | 37.4%                         | 33.1%                                               | 41.8% |
| 2014 | 828                  | 264                           | 31.9%                         | 28.0%                                               | 35.7% |
| 2015 | 1032                 | 415                           | 40.2%                         | 36.3%                                               | 44.1% |

**Supplementary Table C: Predictors of Re-admission to Hospital within 6 months for Inpatients with CDI (N=2741 with 1038 readmissions)**

| Covariate                          | Comparison                | Adjusted HR | 95% CI             |  |
|------------------------------------|---------------------------|-------------|--------------------|--|
| Recurrence in initial admission    | None                      | 0.95        | 0.75, 1.19         |  |
| Recurrence after initial discharge |                           | <b>3.52</b> | <b>2.97, 4.17</b>  |  |
| Age                                | <70                       |             |                    |  |
| 70-79                              |                           | 1.10        | 0.94, 1.28         |  |
| 80+                                |                           | 1.01        | 0.87, 1.17         |  |
| Male                               | Female                    | 1.05        | 0.93, 1.19         |  |
| SEFI                               | Continuous variable       | <b>1.12</b> | <b>1.06, 1.20</b>  |  |
| CCI                                | 0                         |             |                    |  |
| 1                                  |                           | <b>1.25</b> | <b>1.004, 1.55</b> |  |
| 2                                  |                           | <b>1.45</b> | <b>1.16, 1.80</b>  |  |
| 3                                  |                           | <b>1.78</b> | <b>1.44, 2.19</b>  |  |
| Infection Type                     | HCF-onset, HCF-associated |             |                    |  |
| Community-onset, HCF-associated    |                           | 0.94        | 0.79, 1.13         |  |
| Community-associated               |                           | <b>0.74</b> | <b>0.6, 0.91</b>   |  |
| Indeterminate                      |                           | 1.21        | 0.94, 1.56         |  |
| Ambulatory Care                    | Least                     |             |                    |  |
| Visits in previous year            |                           |             |                    |  |
| Q2                                 |                           | 1.07        | 0.87, 1.30         |  |
| Q3                                 |                           | <b>1.34</b> | <b>1.10, 1.63</b>  |  |
| Most                               |                           | <b>1.63</b> | <b>1.33, 2.00</b>  |  |

In the sub-group analysis of those with HCF-onset-HCF-associated CDI, longer hospitalization (> 12 days) prior to CDI onset was not associated with increased risk of subsequent readmission (HR 0.96 (95%CI 0.83-1.12); 717 readmissions among 1,868 individuals.
